# Supplementary material
Source: PubMed Central journal article supplement (PMC2683123)
Supplement: 0811633106_0811633106SI.pdf [file 0811633106_0811633106SI.pdf]

# Supporting Information

Kuppusamy et al. 10.1073/pnas.0811633106

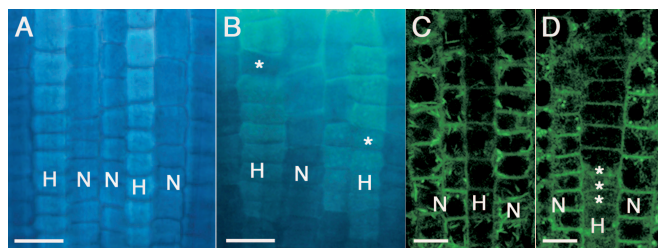

**Fig. S1.** BR11 regulates the levels and expression pattern of *WER*. (A and B) *WER::GUS* expression is expressed in orderly files in wild type (A) but not in *bri1* mutants (B). Wild-type roots were stained for 60 min, and *bri1* roots were stained for 90 min. (C and D) *WER::GFP* expression is seen in N files and is absent in the H files in wild type (C), whereas *WER* expression can be seen in the H file in *bri1* (D). Asterisks indicate aberrant expression of *WER*. N indicates nonhair file; H, hair file. (Scale bars: 50  $\mu$ m.)
